# Supplementary material for: Regulation of the cell division hydrolase RipC by the FtsEX system in Mycobacterium tuberculosis
Source: Springer Nature journal article supplement (doi:10.1038/s41467-023-43770-6), 2023-12-04
Supplement: MOESM1 [file 41467_2023_43770_MOESM1_ESM.pdf]

## Supplementary information for

# Regulation of the cell division hydrolase RipC by the FtsEX system in *Mycobacterium tuberculosis*

Jianwei Li<sup>1, #</sup>, Xin Xu<sup>1, #</sup>, Jian Shi<sup>2</sup>, Juan A. Hermoso<sup>3, \*</sup>, Lok-To Sham<sup>4, \*</sup>, and Min Luo<sup>1, 2, \*</sup>

<sup>1</sup> Department of Biological Sciences, Faculty of Science, National University of Singapore

<sup>2</sup> Center for Bioimaging Sciences, Department of Biological Sciences, National University of Singapore

<sup>3</sup> Department of Crystallography and Structural Biology, Instituto de Química-Física “Blas Cabrera”, Consejo Superior de Investigaciones Científicas, Madrid, Spain

<sup>4</sup> Infectious Diseases Translational Research Programme and Department of Microbiology and Immunology, Yong Loo Lin School of Medicine, National University of Singapore

# These authors contributed equally: Jianwei Li, Xin Xu

\*Corresponding author. **Email:** [xjuan@iqfr.csic.es](mailto:xjuan@iqfr.csic.es), [lsham@nus.edu.sg](mailto:lsham@nus.edu.sg) and [dbslmin@nus.edu.sg](mailto:dbslmin@nus.edu.sg)

### This PDF file includes:

Supplementary Figures 1 to 12

Supplementary Tables 1 to 2

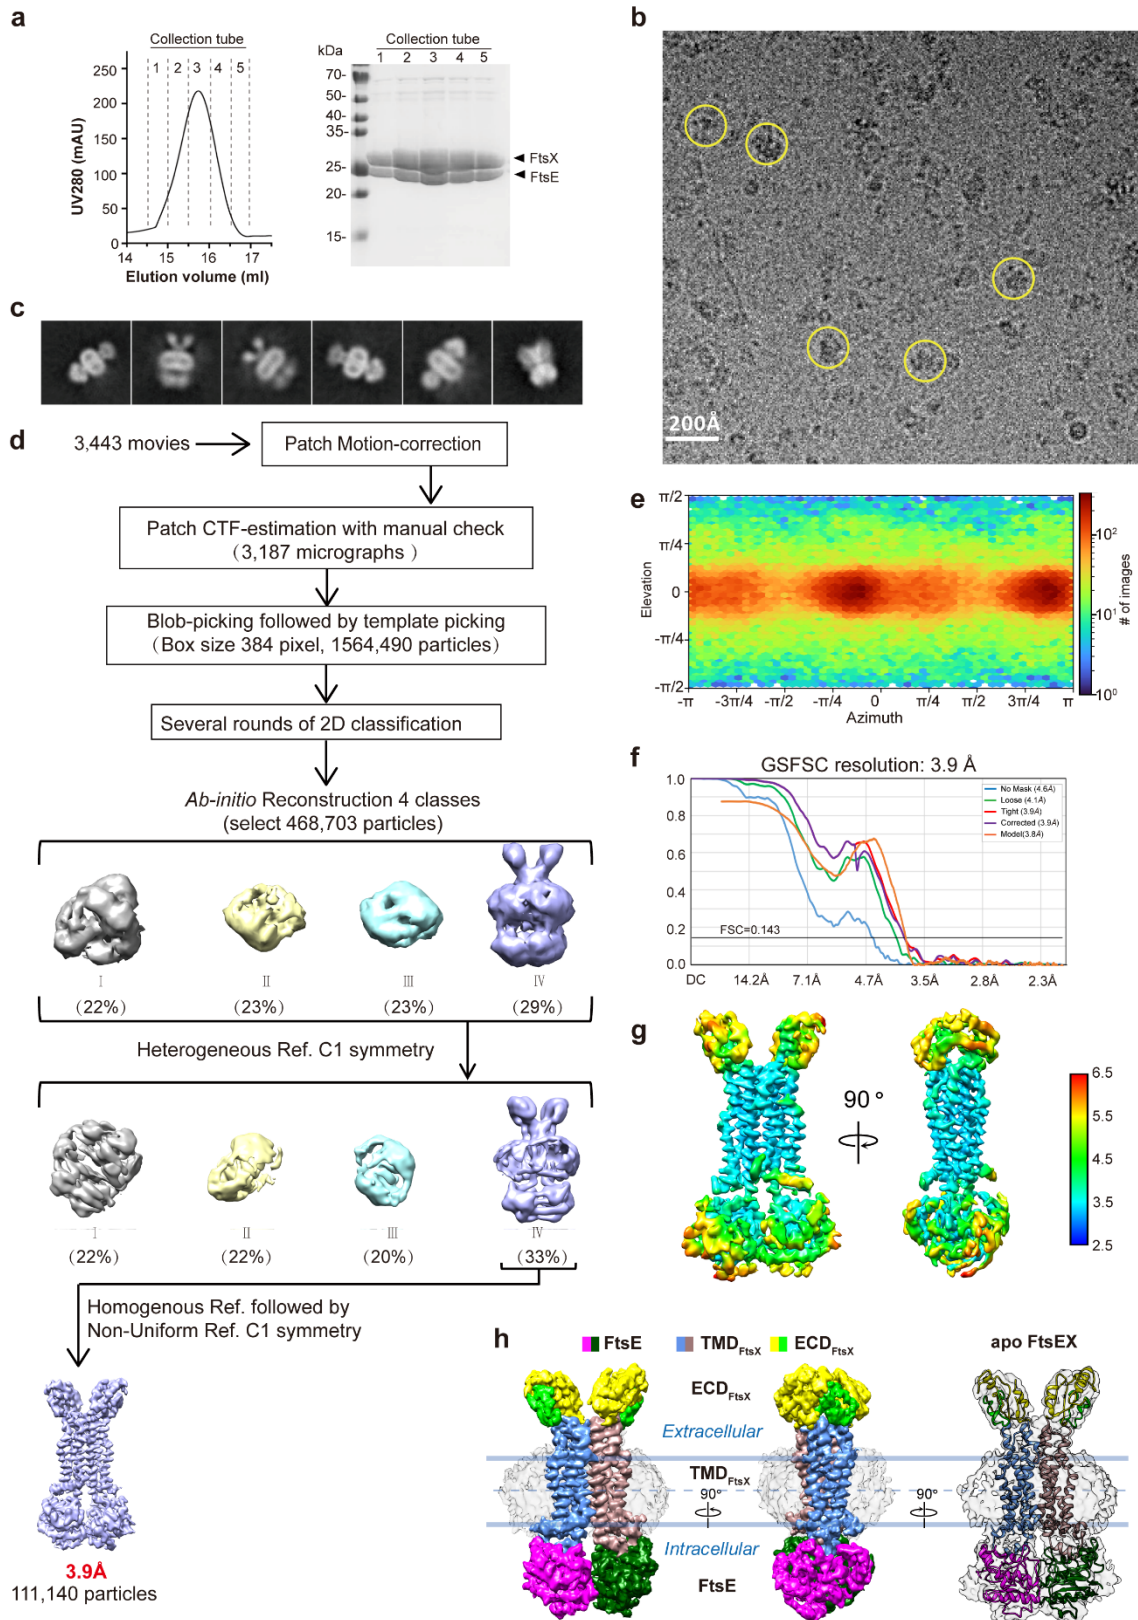

**Supplementary Figure 1. Biochemical reconstitution and single-particle cryo-EM analysis of FtsEX complex.** a, SEC profile and SDS-PAGE gel of purified FtsEX reconstituted in peptidiscs.

Source data are provided as a Source Data file. **b**, Representative cryo-EM image with several particles marked by yellow circles. **c**, Representative 2D averages of cryo-EM particle images. The box dimension is 340 Å. **d**, Image processing flowchart. The final maps of one major conformation with its overall resolutions is indicated in red. **e**, Angular distribution of the cryo-EM particles included in the final 3D reconstruction. **f**, The Fourier shell correlation (FSC) curve: gold standard FSC between two half data maps or model with the final map, with indicated resolution at FSC=0.143 (FSC corrected applied). Source data are provided as a Source Data file. **g**, The cryo-EM map filtered to the estimated overall resolution and colored according to local resolution. **h** Front- and side-views of the cryo-EM density map of FtsEX in the absence of ATP (left and middle), and with the built model shown (right). Color scheme: TMD<sub>FtsX</sub> in cornflower blue and rosy brown, the upper lobe of ECD<sub>FtsX</sub> in yellow, and the lower lobe of ECD<sub>FtsX</sub> in green, FtsE in magenta and dark green.

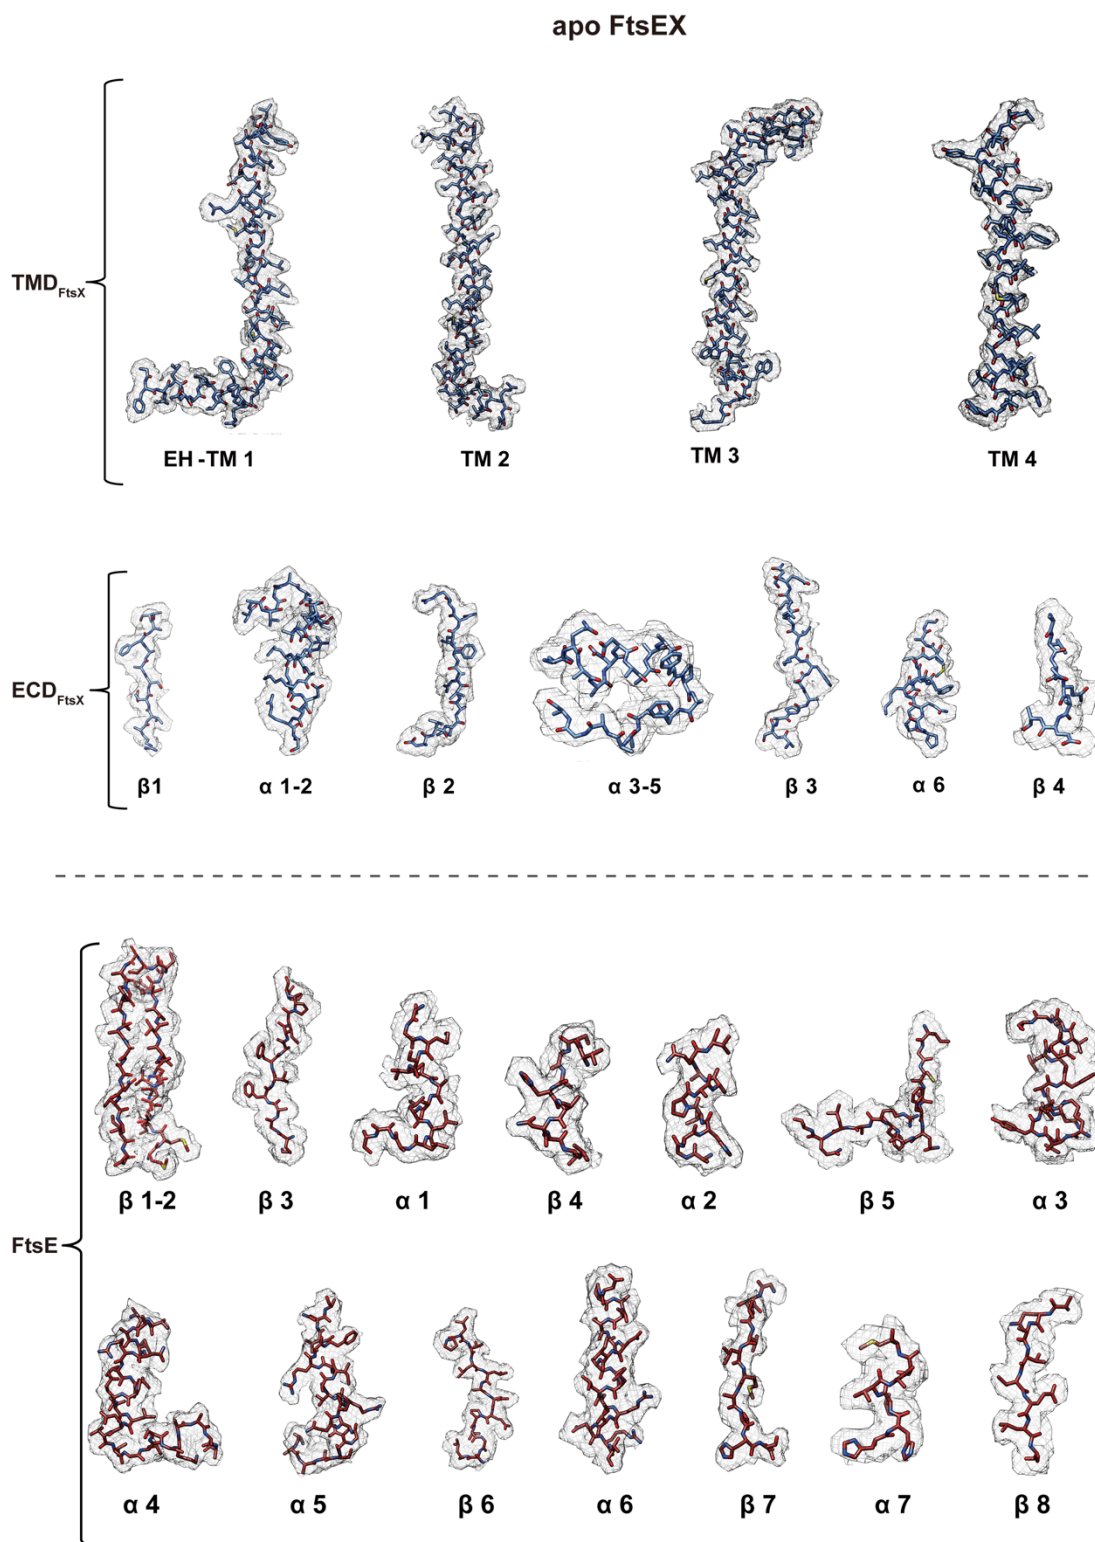

**Supplementary Figure 2. Cryo-EM density of different regions of FtsE and FtsX in the structure of FtsEX complex.**



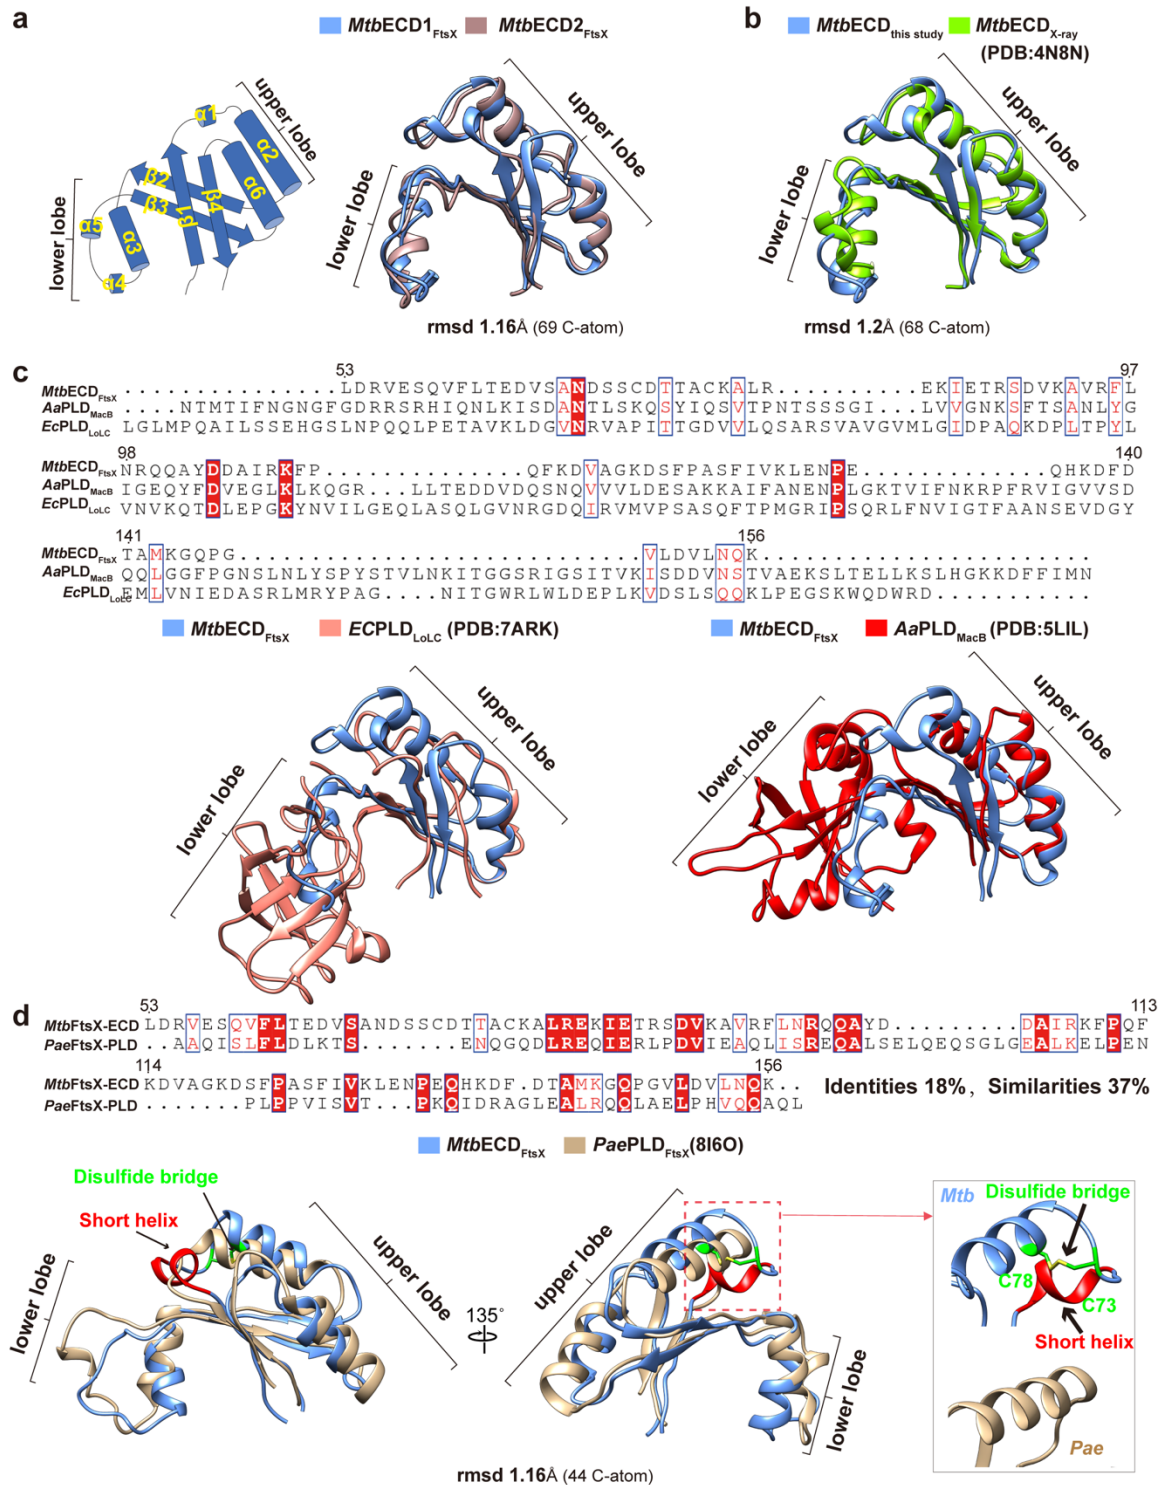

**Supplementary Figure 3. Structural comparison of ECD monomers.** **a**, Left: Topology diagram of ECD domain in *MtbFtsEX*.  $\alpha$  helices are shown as cylinder,  $\beta$  sheets are shown as arrows; Right: Structural comparison between the two ECD domains in *MtbFtsEX*, with the structures overlaid on each other. **b**, Comparison of the ECD monomer structure with a previously determined X-ray structure (PDB code: [4N8N](https://www.rcsb.org/structure/4N8N)) [<https://www.rcsb.org/structure/4N8N>]. **c**, Sequence alignment and structural comparison of the ECD/PLD from *MtbFtsX*, *EcLoLC* (PDB code: [7ARK](https://www.rcsb.org/structure/7ARK)

[<https://www.rcsb.org/structure/7ARK>]), and AaMacB (PDB code: [5LIL](https://www.rcsb.org/structure/5LIL) [<https://www.rcsb.org/structure/5LIL>]). **d**, Sequence alignment and structural comparison of the ECD/PLD from *PaeFtsX* (PDB code: [8I6O](https://www.rcsb.org/structure/8I6O) [<https://www.rcsb.org/structure/8I6O>]) and *MtbFtsX*. In *MtbFtsEX*, the extra short helix and the disulfide bridge are labeled in red and green, respectively.

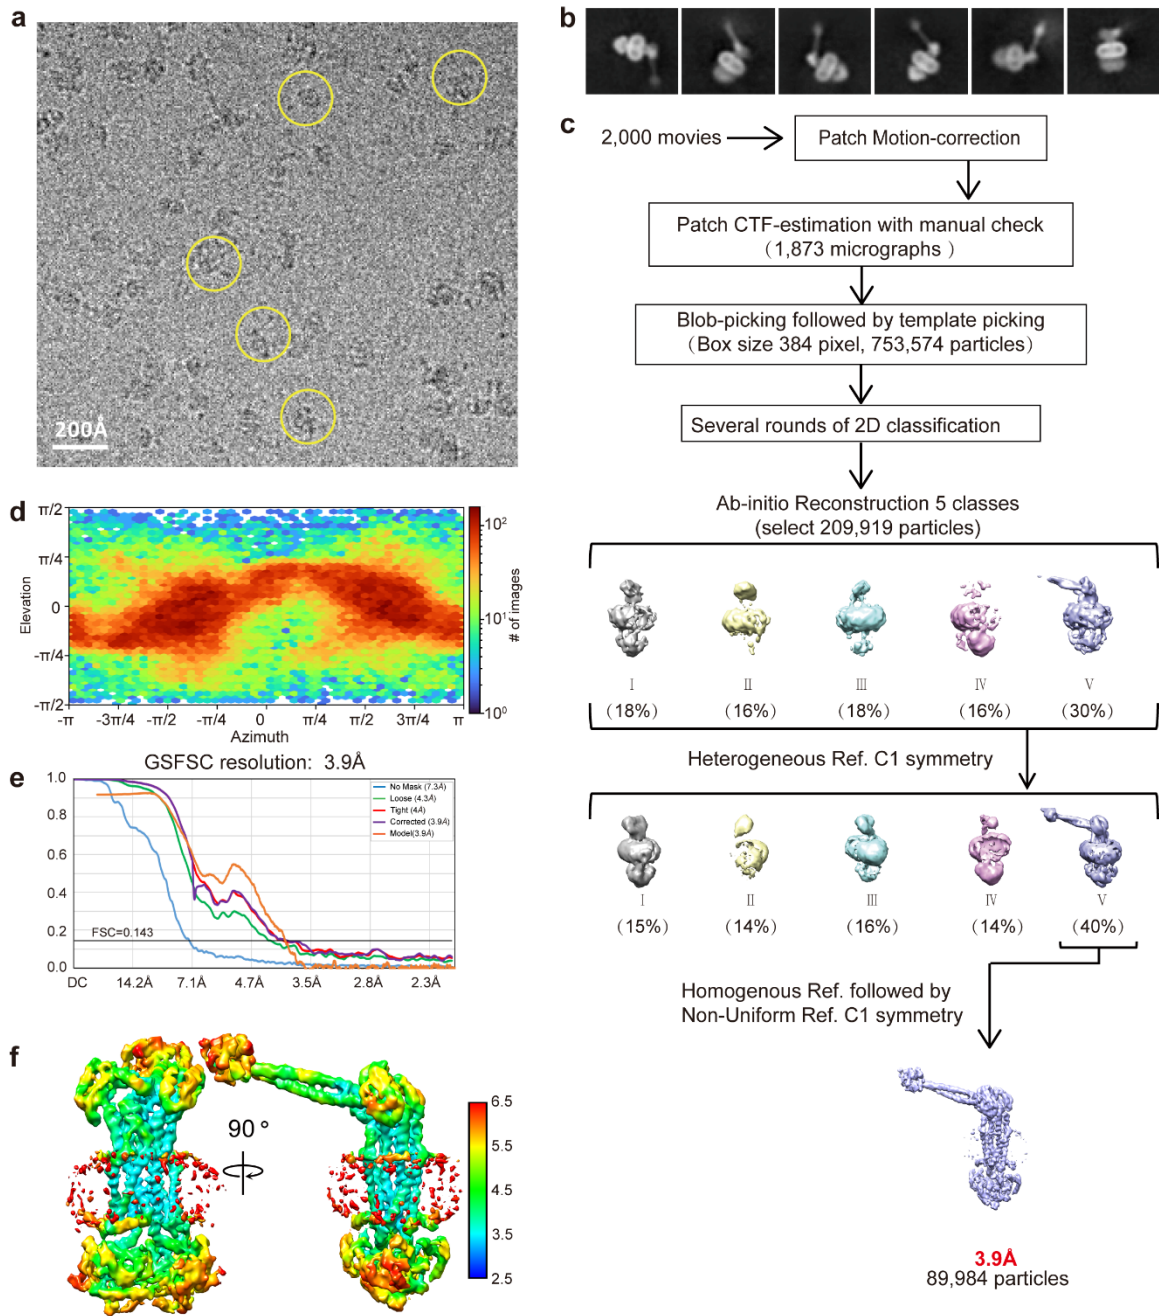

**Supplementary Figure 4. Single-particle cryo-EM analysis of FtsEX-RipC complex in the absence of ATP.** **a**, Representative cryo-EM image with several particles marked by circles. **b**, 2D averages of cryo-EM particle images. The box dimension is 400 Å. **c**, Image processing flowchart. The final maps of one major conformation with its overall resolution is indicated in red. **d**, Angular distribution of the cryo-EM particles included in the final 3D reconstruction. **e**, The Fourier shell correlation (FSC) curve: gold standard FSC between two half data maps or the final model with the EM map, with indicated resolution at FSC=0.143 (FSC corrected applied). Source data are provided as a Source Data file. **f**, The surface cryo-EM map was filtered to the estimated overall resolution and colored according to local resolution.

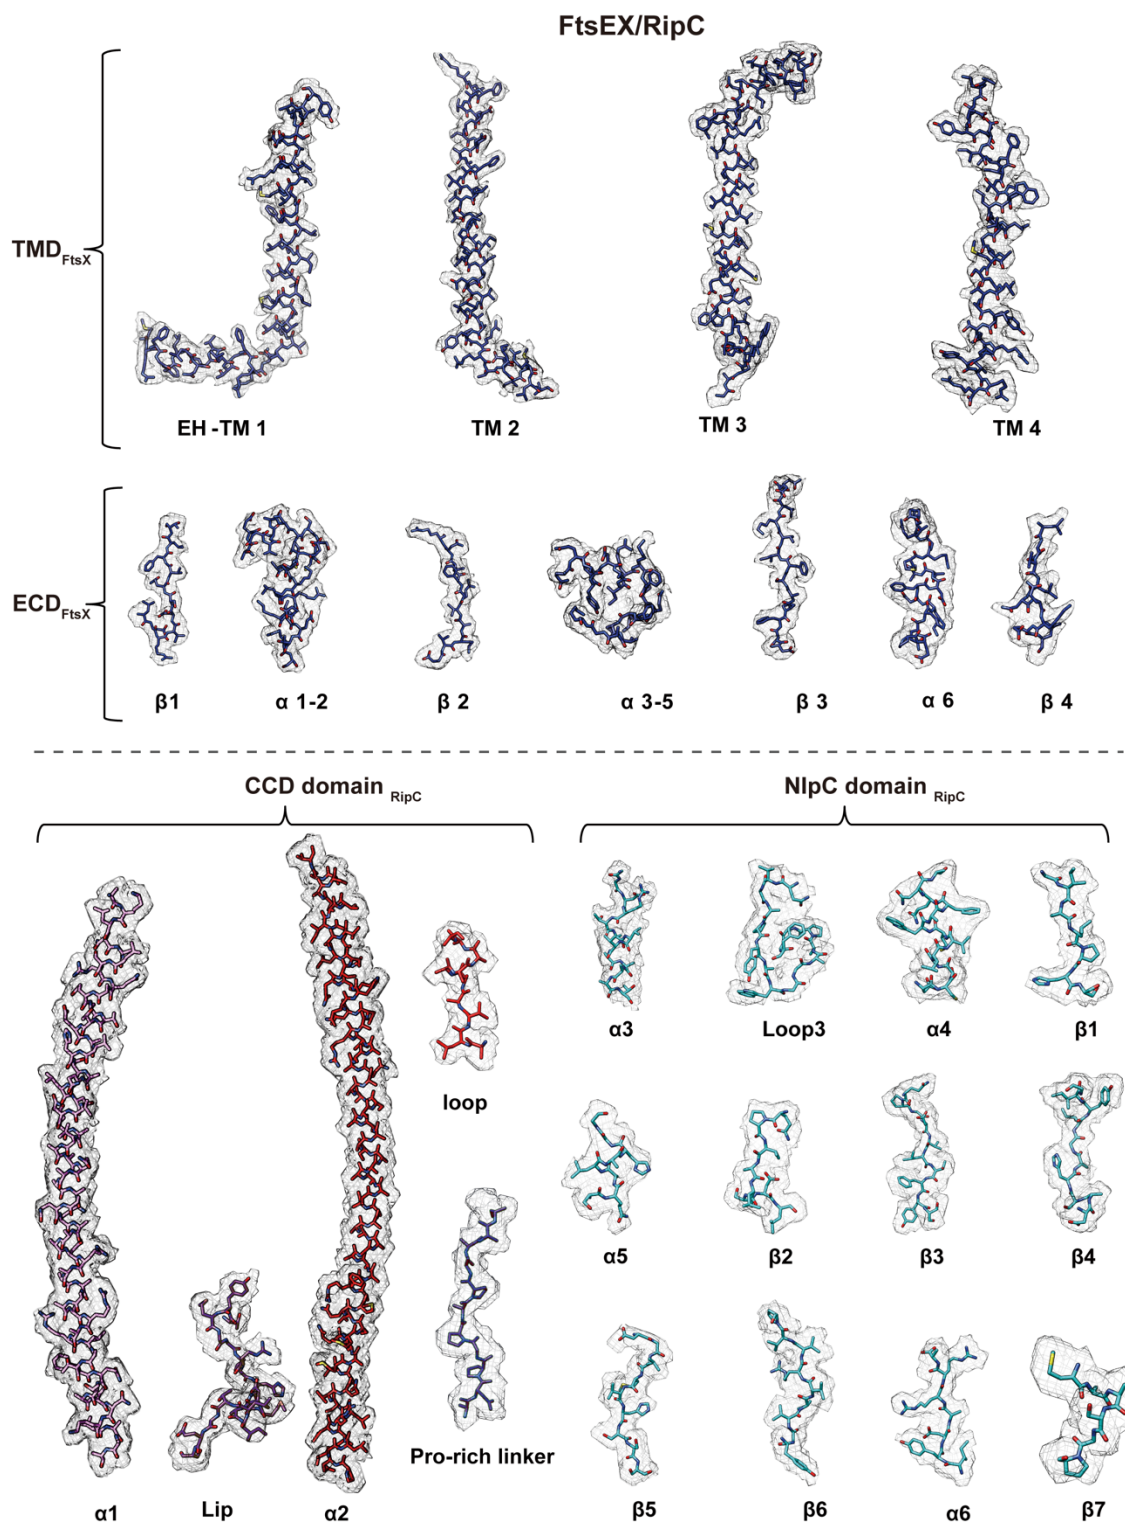

**Supplementary Figure 5. Cryo-EM density of different regions of FtsX and RipC in the structure of FtsEX-RipC complex.**

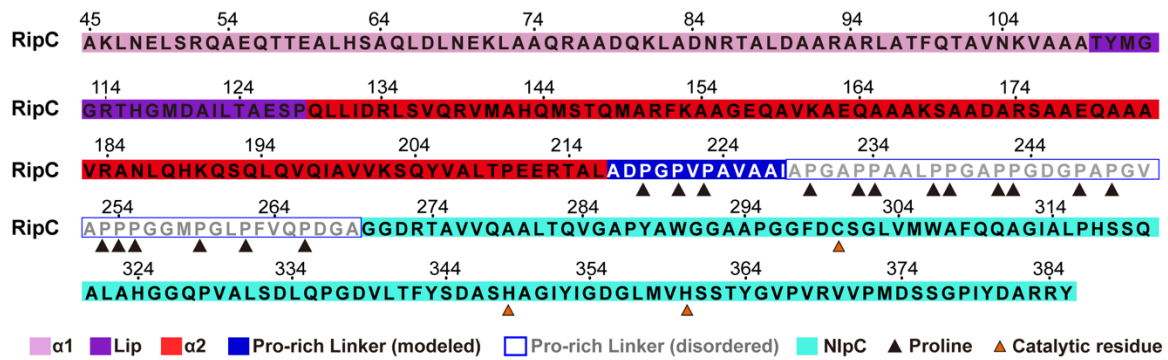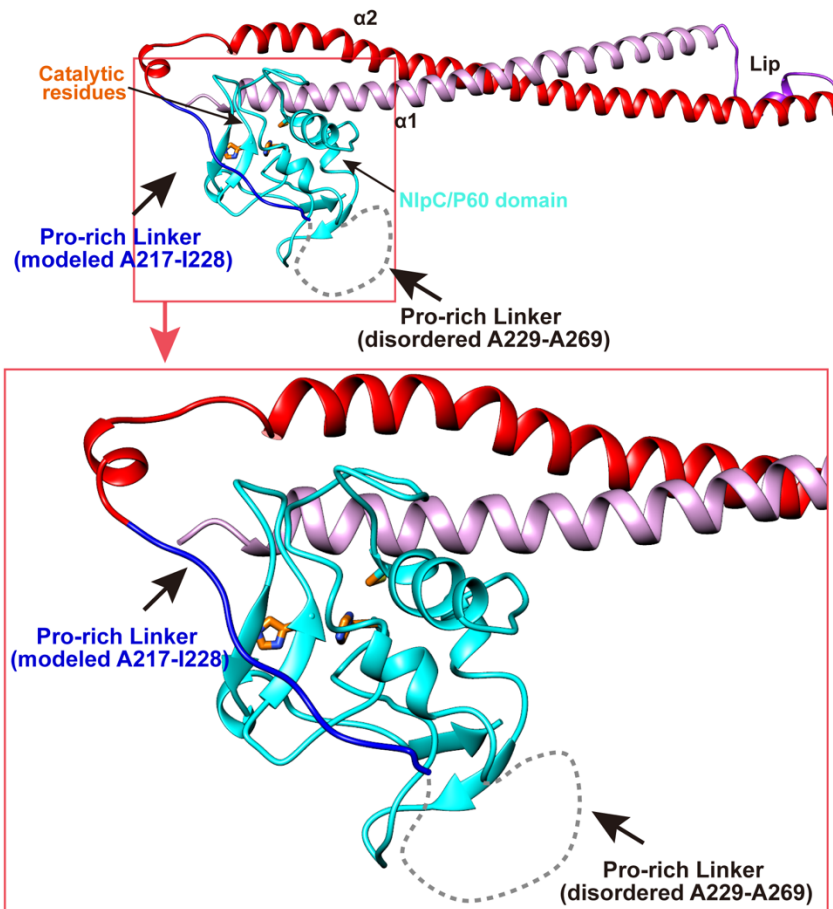

**Supplementary Figure 6. Sequence and structure analysis of RipC in an autoinhibited state.** The structure is color-coded to highlight different domains, including the α1 domain in plum, lip in purple, α2 in red, and the NlpC/P60 catalytic domain in cyan. The modeled Pro-rich linker is shown in blue, while the disordered Pro-rich linker is denoted by a dashed line. The catalytic residues are highlighted in orange. The Pro-rich linker contains 18 proline residues, as denoted by black triangles underneath.



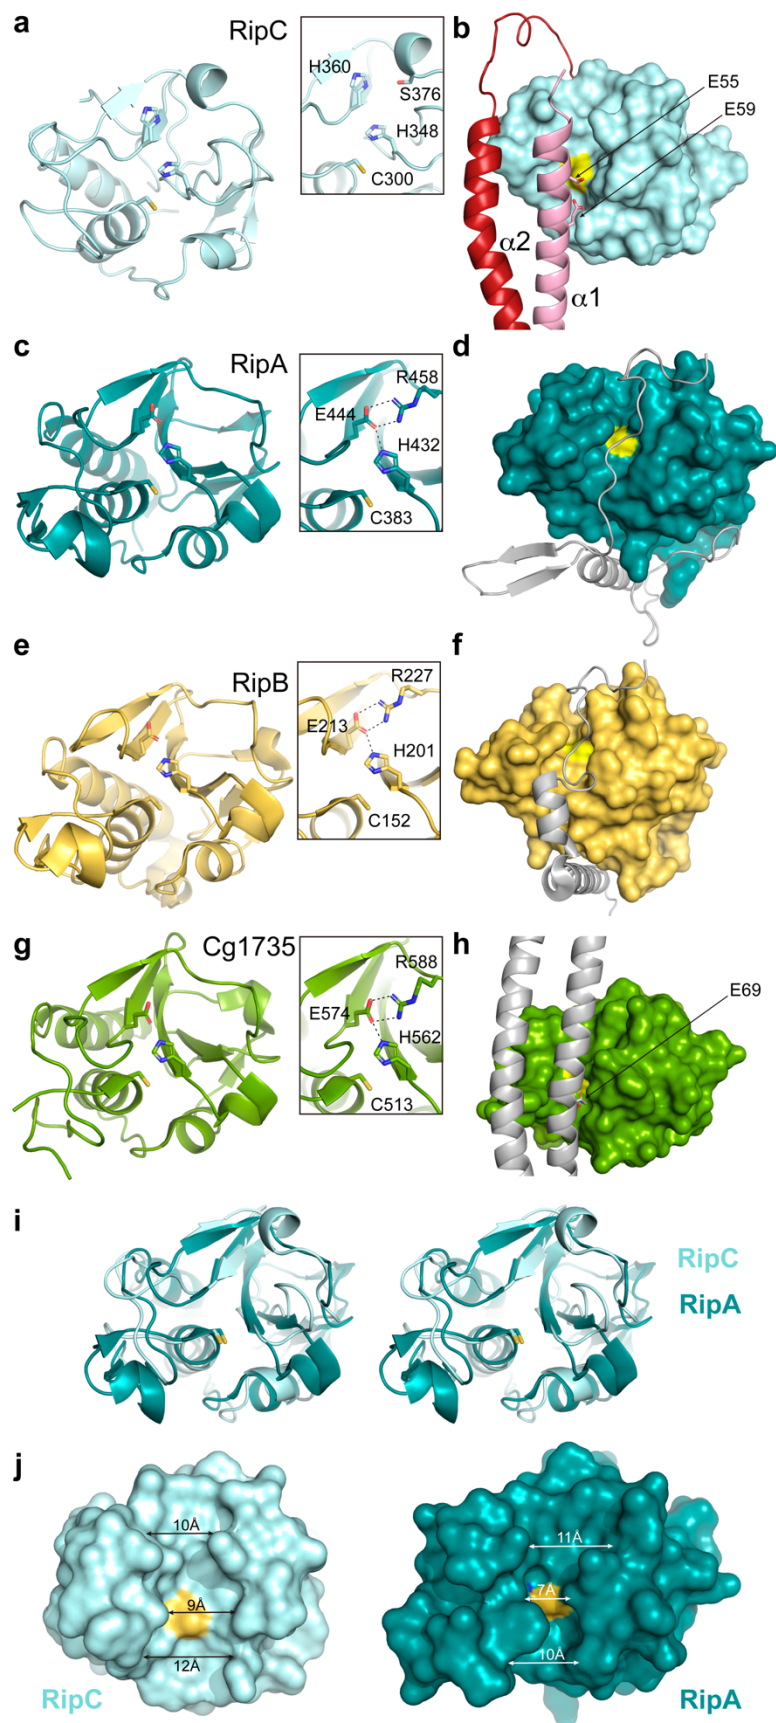



**Supplementary Figure 7. Comparison of RipC catalytic domain with structural homologs.** **a**, Cartoon representation of the catalytic domain of RipC (this work). The zoomed area shows the catalytic triad Cys-His-His (C300, H348, H360) observed in the NlpC/P60 family; this triad is not conserved in RipA homologues. **b**,  $\alpha$ 1 helix in RipC blocks the active site of RipC in an auto-inhibited conformation with two glutamate residues (E55, E59) interacting with residues of the catalytic domain. **c**, Cartoon representation of the catalytic domain of RipA (PDB code: [3NE0](https://www.rcsb.org/structure/3NE0) [<https://www.rcsb.org/structure/3NE0>]). The zoomed area shows catalytic residues represented as capped sticks. **d**, The N-terminal segment of RipA (residues 260-321) blocks the active site of RipA. **e**, Cartoon representation of the catalytic domain of RipB (PDB code: [3PBI](https://www.rcsb.org/structure/3PBI) [<https://www.rcsb.org/structure/3PBI>]). The zoomed area shows catalytic residues represented as capped sticks. **f**, The N-terminal segment of RipB (residues 30-97) blocks the active site of RipB. **g**, Cartoon representation of the catalytic domain of Cg1735 (PDB code: [8AUC](https://www.rcsb.org/structure/8AUC) [<https://www.rcsb.org/structure/8AUC>]). The zoomed area shows catalytic residues represented as capped sticks. **h**, Two helices from the coiled-coil domain of a symmetry-related molecule block the active site of Cg1735; residue E69 from the coiled-coil helix makes an H-bond with the catalytic C513. **i**, Stereo view showing the changes in the loops around the catalytic center of RipC and RipA (catalytic Cys residue represented as capped sticks). **j**, Molecular surface representation of RipC and RipA. Position of the catalytic Cys residue is highlighted in yellow. Active sites of both enzymes present relevant differences in shape and dimensions.

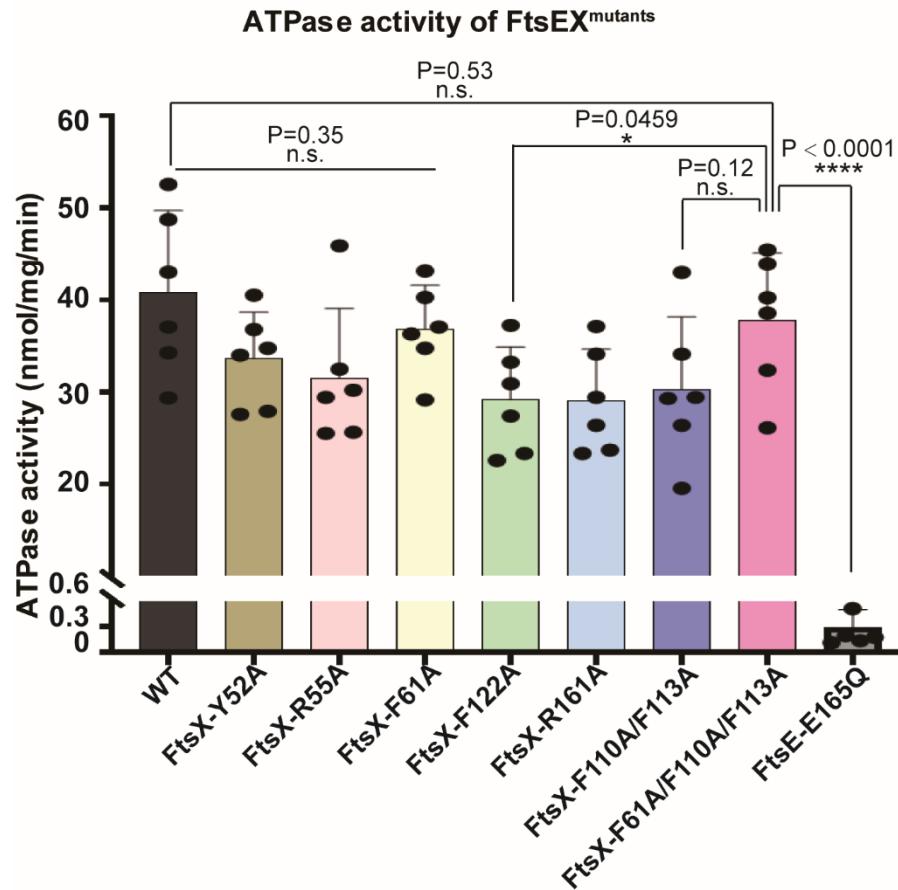

**Supplementary Figure 8. ATPase activity of FtsEX mutants.** Inhibition of the ATPase activity of FtsEX was observed to a minor extent upon mutation of residues involved in the interaction between FtsX and RipC. The mutant FtsE<sup>E165Q</sup>X serves as a negative control. n=6 replicates, error bars were presented as mean  $\pm$  SD. Two-tailed unpaired t test was applied; \*P<0.05, \*\*\*\*P < 0.0001, n.s. no significant difference. The exact P values are shown in figure and source data are provided as a Source Data file.

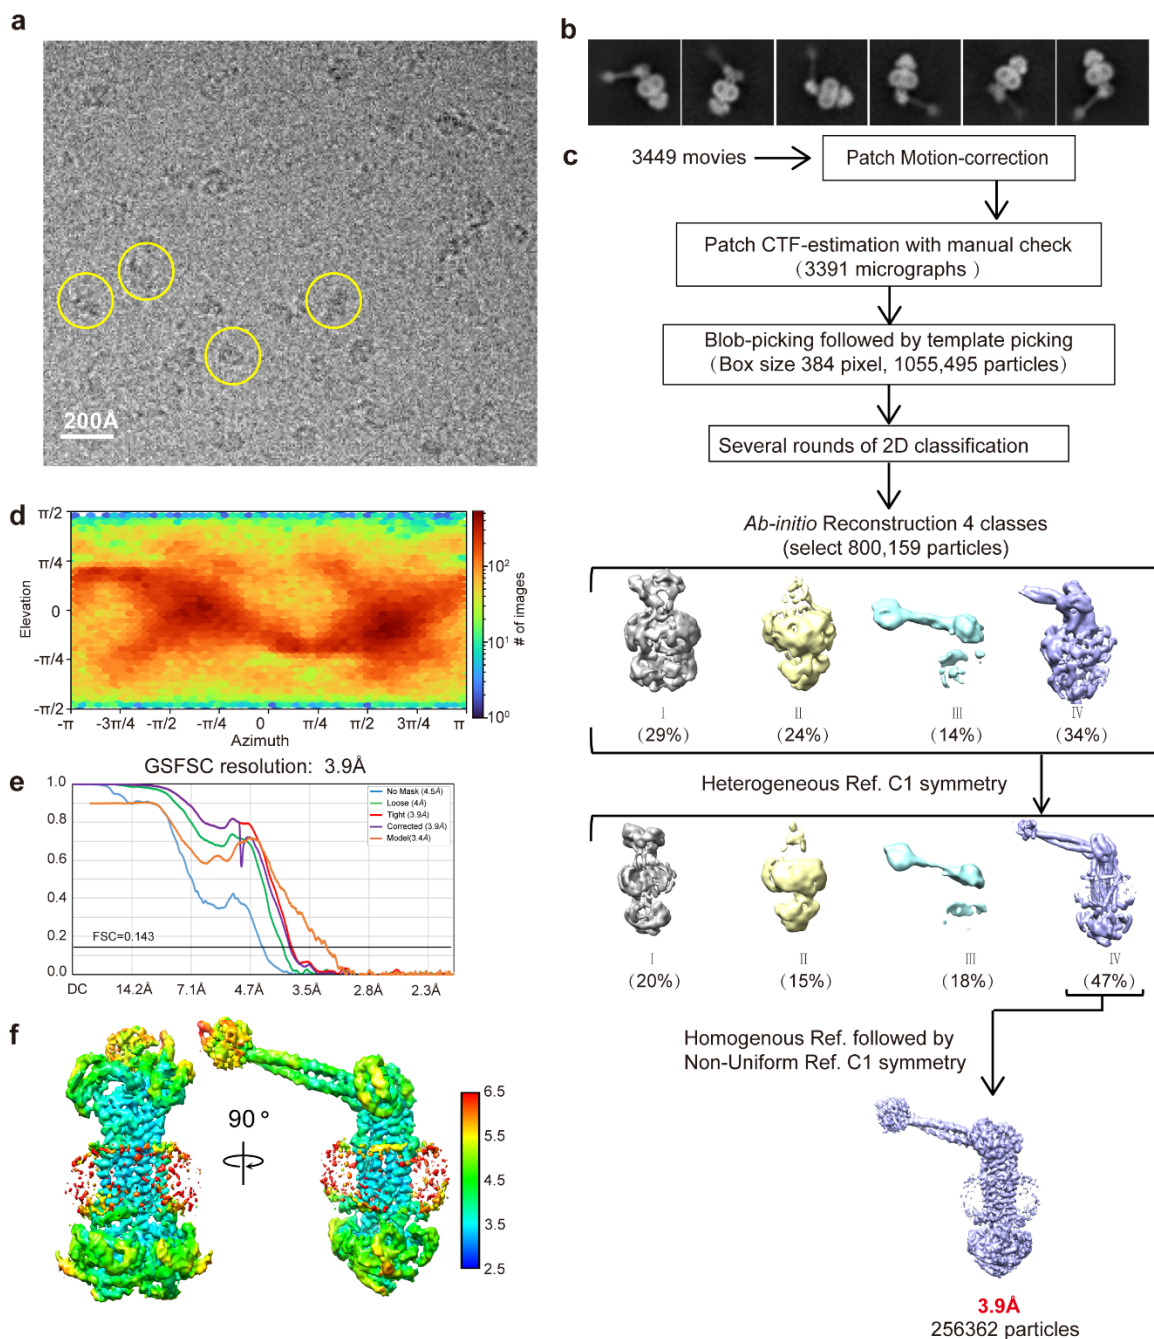

**Supplementary Figure 9. Single-particle cryo-EM analysis of FtsE<sup>E165Q</sup>X-RipC complex in the presence of ATP.** **a**, Representative cryo-EM image with several particles marked by yellow circles. **b**, 2D averages of cryo-EM particle images. The box dimension is 400 Å. **c**, Image processing flowchart. The final maps of one major conformation with its overall resolution are indicated in red. **d**, Angular distribution of the cryo-EM particles included in the final 3D reconstruction. **e**, The Fourier shell correlation (FSC) curve: gold standard FSC between two half data maps with indicated resolution at FSC=0.143 (FSC corrected applied). Source data are provided as a Source Data file. **f**, The surface cryo-EM map was filtered to the estimated overall resolution and coloured according to local resolution.

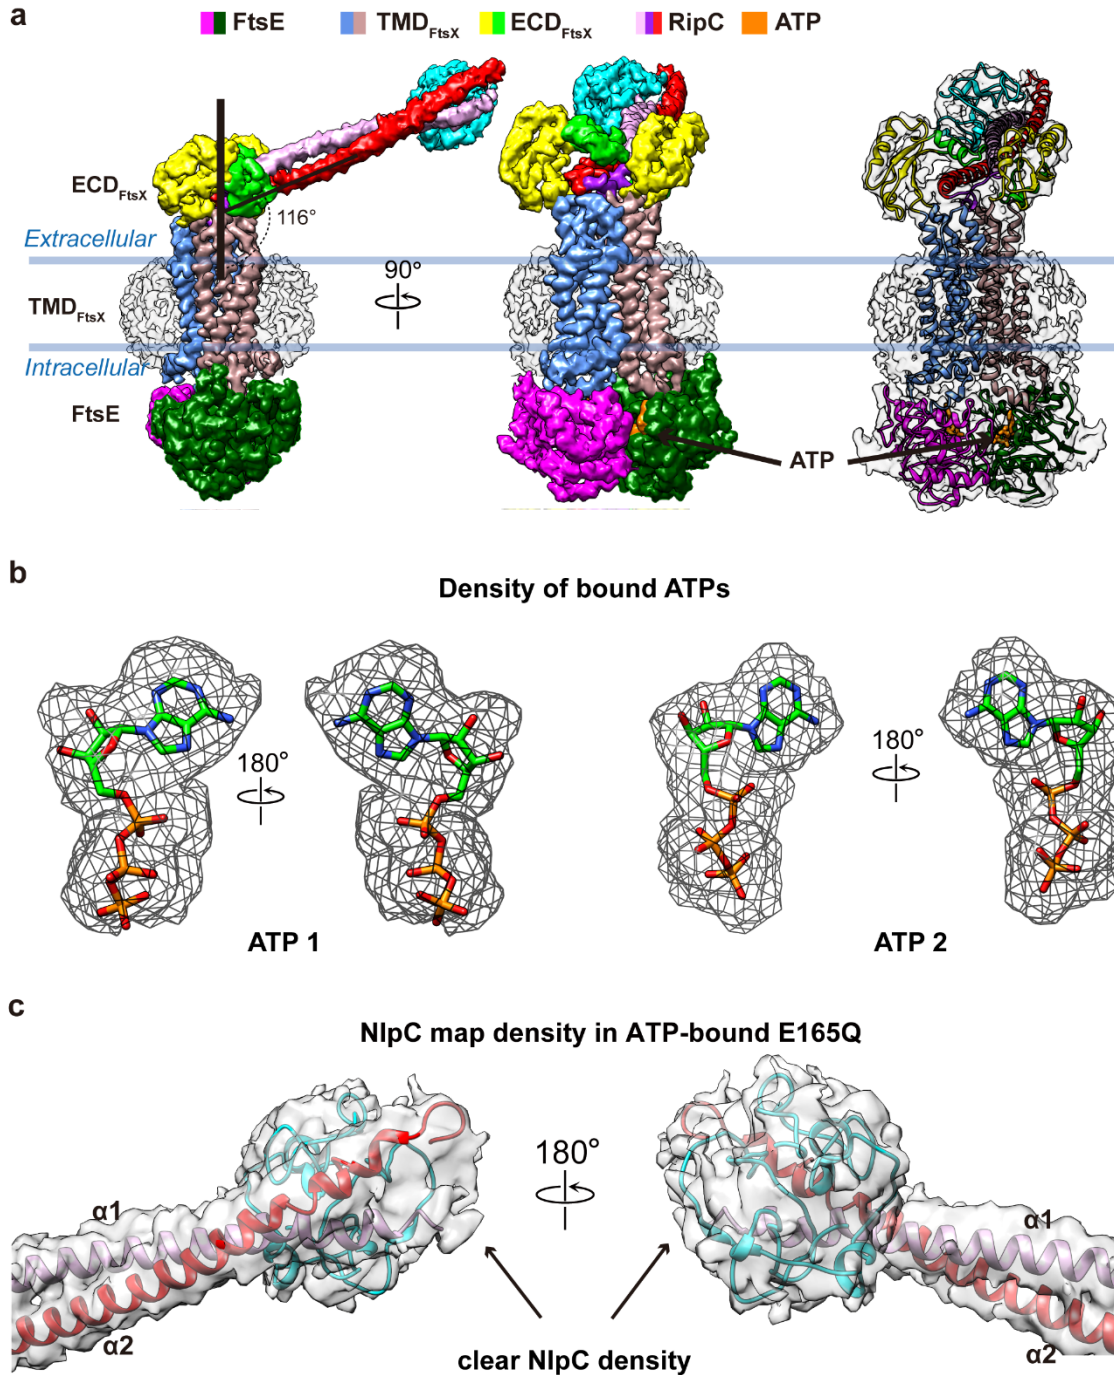

**Supplementary Figure 10. Cryo-EM density maps and model fitting of the FtsE<sup>E165Q</sup>-RipC complex in the presence of ATP.** **a**, Side- and front- views of the cryo-EM density maps of FtsE<sup>E165Q</sup>-RipC in the presence of ATP (left and middle), along with the ribbon representation of the structure model (right). The color scheme is as follows: FtsX in cornflower blue/rosy brown, FtsE in magenta/dark green, ATP in orange, the  $\alpha 1$  helix of bound RipC in plum, the  $\alpha 2$  helix of bound RipC in red, and the lip region in between colored in purple, the NlpC catalytic domain in cyan. **b**, The cryo-EM density map of bound-nucleotide in the FtsE<sup>E165Q</sup>-RipC complex. The conformation is identified as ATP and exhibits a good fit. **c** Clear density of the NlpC domain is

observed in FtsE<sup>E165Q</sup>X-RipC complex map. The EM density of ATP-bound FtsE<sup>E165Q</sup>X-RipC is in gray with 60% transparency.



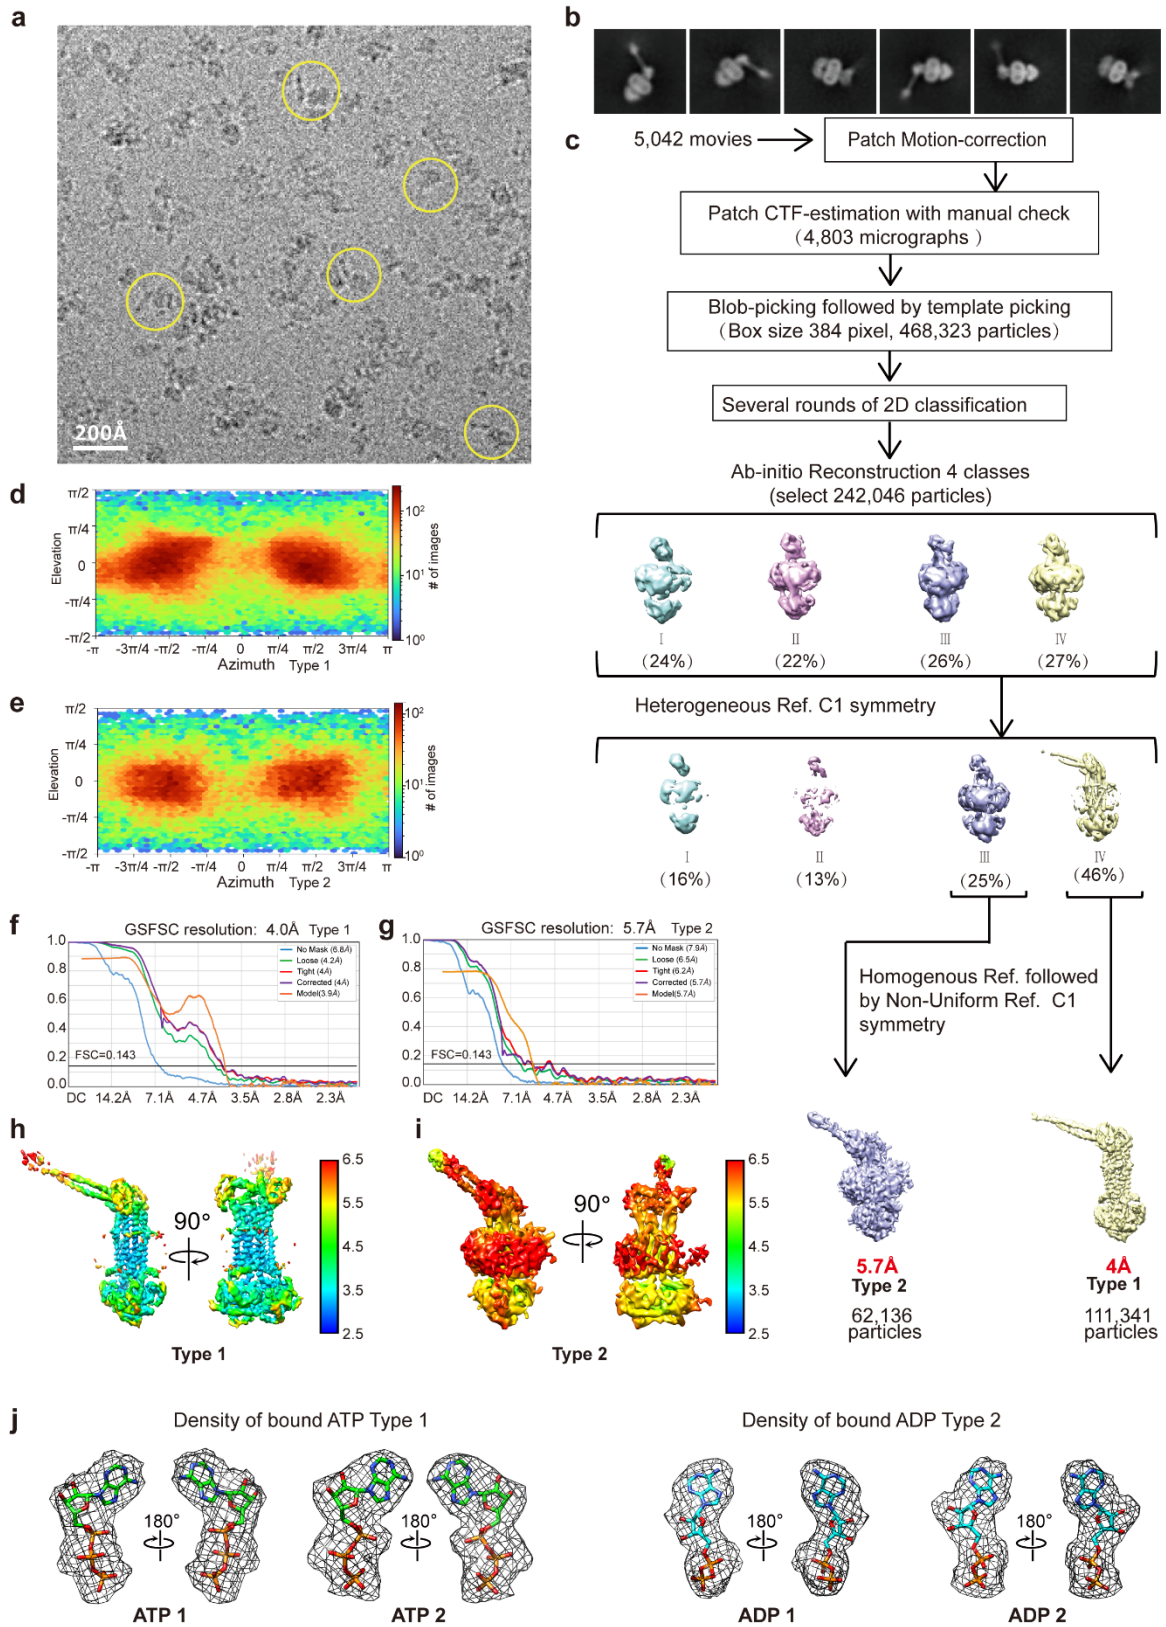

**Supplementary Figure 11. Single-particle cryo-EM analysis of FtsEX-RipC complex in the presence of ATP with two major conformations elucidated. a, Representative cryo-EM image**



with several particles marked by yellow circles. **b**, 2D averages of cryo-EM particle images. The box dimension is 400 Å. **c**, Image processing flowchart. The final maps of two major conformations with their overall resolutions are indicated in red. **d** and **e**, Angular distribution of the cryo-EM particles included in the final 3D reconstruction for the two major conformations. **f** and **g**, The Fourier shell correlation (FSC) curve: gold standard FSC between two half data maps with indicated resolution at FSC=0.143 (FSC corrected applied). Source data are provided as a Source Data file. **h** and **i**, The surface cryo-EM map was filtered to the estimated overall resolution and colored according to local resolution for the two types of conformation. **j**, The cryo-EM density map of bound-nucleotide in the two major conformational types of the FtsEX/RipC complex. The Type 1 conformation (left) is identified as ATP, while the Type 2 conformation (right) is modeled with ADP and exhibits a good fit.

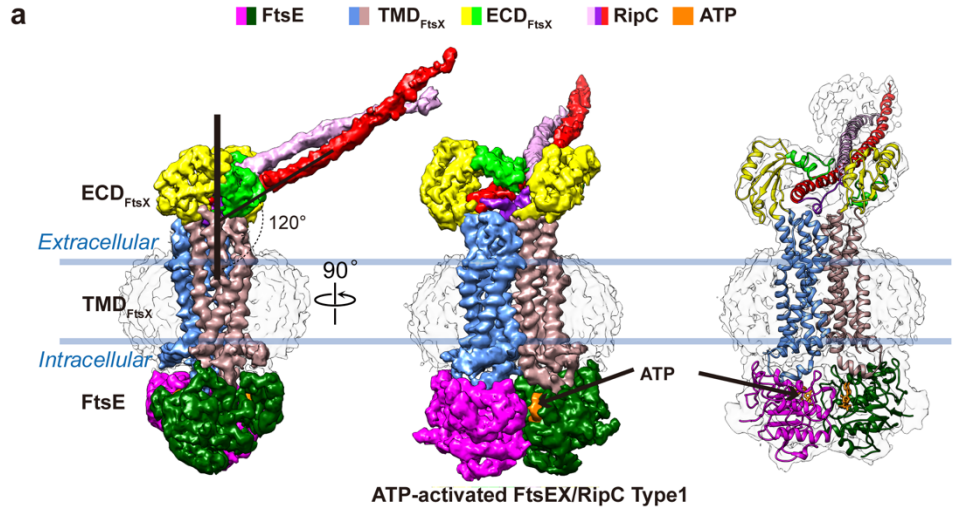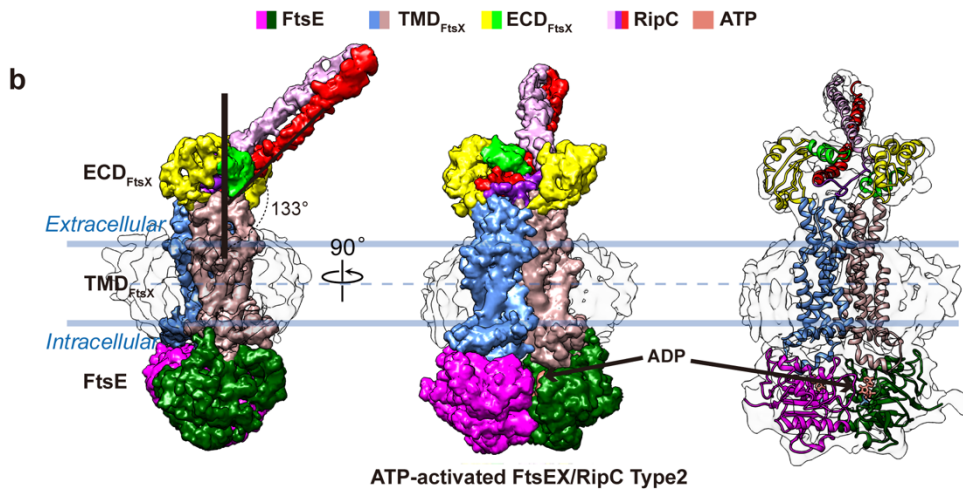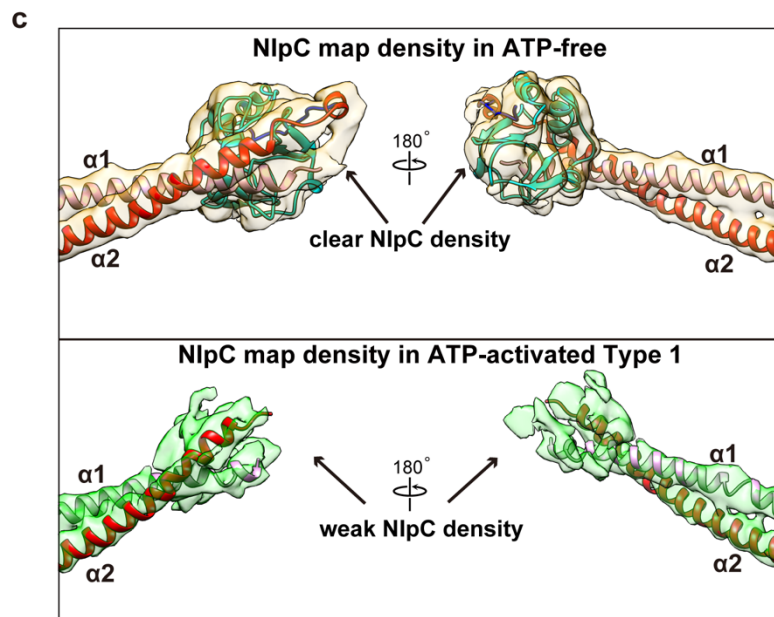

**Supplementary Figure 12. Cryo-EM density maps and model fitting of the two types of FtsEX-RipC complex in the presence of ATP.** **a** and **b**, Side- and front- views of the cryo-EM density maps of FtsEX-RipC in the presence of ATP or ADP (left and middle), along with the ribbon representation of the structure model (right). The panel **a** is for Type 1 and the panel **b** is for Type 2. The color scheme is as follows: FtsX in cornflower blue/rosy brown, FtsE in magenta/dark green, ATP in orange, ADP in salmon, the  $\alpha$ 1 helix of bound RipC in plum, the  $\alpha$ 2 helix of bound RipC in red, and the lip region in between colored in purple. **c**, The difference of NlpC/P60 domain density in ATP-free state and ATP-activated Type 1 state. Clear EM density of the NlpC domain is observed in the ATP-free state. A weaker density is observed in the ATP-activated Type 1 state, indicating the start of the release of the NlpC/P60 domain for activation. The EM density of the ATP-free state is in yellow with 60% transparency, ATP-activated Type 1 is shown in green.

**Supplementary Table 1. Oligonucleotides used in this study**

| Primer                                          | Sequence (5'-3')                            | template                             |
|-------------------------------------------------|---------------------------------------------|--------------------------------------|
| For construction of His <sub>6</sub> - FtsEX    |                                             |                                      |
| EX-WT F                                         | GGCAGCCATATGGTGATGATCACCCCTGGACCA           | genome of Mycobacterium tuberculosis |
| EX-WT R                                         | GCCGCAAGCTTCTATCGCCGCACGTAGAGGC             |                                      |
| For construction of His <sub>6</sub> -SUMO-RipC |                                             |                                      |
| RipC-WT-F                                       | ATTGGTGGATCCAATGTGCTGGCTGATCCGG             | genome of Mycobacterium tuberculosis |
| RipC-WT-R                                       | GGTGCTCGAGTCAGTAACGGCGGGCGTCGT              |                                      |
| For FtsE, FtsX, and RipC mutations              |                                             |                                      |
| FtsE-D164A-F                                    | CTGCTGGCCGCCGAGCCCACCGGAAACCTCG             | Vector-FtsEX-WT                      |
| FtsE-D164A-R                                    | GGTGGGCTCGGCGGCCAGCAGTACCAGCGG              |                                      |
| FtsE-E165Q-F                                    | CTGGCCGACCAGCCCACCGGAAACCTCGAC              | Vector-FtsEX-WT                      |
| FtsE-E165Q-R                                    | TCCGGTGGGCTGGTCGGCCAGCAGTACCAG              |                                      |
| FtsX-Y52A-F                                     | CCGGGCCATCGCTCTCGACCGGGTGGAATC              | Vector-FtsEX-WT                      |
| FtsX-Y52A-R                                     | CCGGTCGAGAGCGATGGCCCGGGAGCTGTC              |                                      |
| FtsX-R55A-F                                     | CTATCTCGACGCGGTGGAATCTCAGGTCT               | Vector-FtsEX-WT                      |
| FtsX-R55A-R                                     | AGATTCCACCGCGTCGAGATAGATGGCCCG              |                                      |
| FtsX-F61A-F                                     | ATCTCAGGTCGCTCTCACCGAAGACGTTTC              | Vector-FtsEX-WT                      |
| FtsX-F61A-R                                     | TTCGGTGAGAGCGACCTGAGATTCCACCCG              |                                      |
| FtsX-F110A-F113A-F                              | GCAAGGCTCCCCAGGCCAAGGACGTGGCGGGCAAGG        | Vector-FtsEX-WT                      |
| FtsX-F110A-F113A-R                              | TCCTTGGCCTGGGGAGCCTTGCGGATGGCATCGTCAT       |                                      |
| FtsX-F61A-F110A-F113A-F                         | ATCTCAGGTCGCTCTCACCGAAGACGTTTC              | Vector-FtsX-F110A-113A               |
| FtsX-F61A-F110A-F113A-R                         | TTCGGTGAGAGCGACCTGAGATTCCACCCG              |                                      |
| FtsX-F122A-F                                    | CAAGGATTCGGCCCCGGCGTCGTTCAATTGT             | Vector-FtsEX-WT                      |
| FtsX-F122A-R                                    | CGACGCCGGGGCCGAATCCTTGCCCGCCAC              |                                      |
| FtsX-R161A-F                                    | GCTGATTGACGCGCTGTTCCGCGGTCTTGA              | Vector-FtsEX-WT                      |
| FtsX-R161A-R                                    | CGCGAACAGCGCGTCAATCAGCTCCTTTTG              |                                      |
| FtsX-Kink-2A-F (54-55 replaced by Ala)          | GCCGCGGTGGAATCTCAGGTCTTTCTCACCGAAGA         | Vector-RipC-WT                       |
| FtsX-Kink-2A-R (54-55 replaced by Ala)          | TGAGATTCCACCGCGGCGAGATAGATGGCCCGGGA         |                                      |
| FtsX-Kink-3A-F (51-53 replaced by Ala)          | GCCGCTGCCGACCGGGTGGAATCTCAGGTCT             | Vector-RipC-WT                       |
| FtsX-Kink-3A-R (51-53 replaced by Ala)          | ACCCGGTCGGCAGCGGCGGCCCGGGAGCTGTGCGG         |                                      |
| FtsX-Kink-7A-F (49-55 replaced by Ala)          | GCTGCAGCCGCGGCTGCCGCAGTGGAATCTCAGGTCTTTCTC  | Vector-RipC-WT                       |
| FtsX-Kink-7A-R (49-55 replaced by Ala)          | TGCGGCAGCCGCGGCTGCAGCGGAGCTGTGCGCCAACCGGACC |                                      |
| RipC-R115A-F                                    | CATGGGTGGTGCTACCCACGGCATGGATGC              | Vector-RipC-WT                       |
| RipC-R115A-R                                    | GCCGTGGGTAGCACCAACCATGTAGGTAGC              |                                      |

|                    |                                        |                |
|--------------------|----------------------------------------|----------------|
| RipC-D120A-F       | CACGGCATGGCTGCGATCCTGACGGCGGAG         | Vector-RipC-WT |
| RipC-D120A-R       | CAGGATCGCAGCCATGCCGTGGGTACGACC         |                |
| RipC-Q129A-F       | GAGTCCCCGGCACTGTTGATCGATCGGCTA         | Vector-RipC-WT |
| RipC-Q129A-R       | GATCAACAGTGCCGGGGACTCCGCCGTCAG         |                |
| RipC-R134A-F       | GTTGATCGATGCGCTATCGGTACAGCGGGT         | Vector-RipC-WT |
| RipC-R134A-R       | TACCGATAGCGCATCGATCAACAGTTGCGG         |                |
| RipC-Delta-N59-F   | TTGGTGGATCCGCGCTGCACAGTGCGCAGC         | Vector-RipC-WT |
| RipC-Delta-N59-R   | TGTGCAGCGCGGATCCACCAATCTGTTCTCT        |                |
| RipC-M141A-F       | ACAGCGGGTGGCGGCGCATCAAATGTCCACG        | Vector-RipC-WT |
| RipC-M141A-R       | TGATGCGCCGCCACCCGCTGTACCGATAGC         |                |
| RipC-E59A-F        | AGACCACCGCGGCGCTGCACAGTGCGCAGC         | Vector-RipC-WT |
| RipC-E59A-R        | TGCAGCGCCGCGGTGGTCTGCTCGGCCTGCC        |                |
| RipC-Y288A-W290A-F | CCCGCCGCGGCGGGTGGTGCCGCGCCCGGCGG GT    | Vector-RipC-WT |
| RipC-Y288A-W290A-R | CACCACCCGCCGCGGCGGGCGCGCCGACCTGCG TCAA |                |

**Supplementary Table 2. Cryo-EM data collection, refinement and validation statistics**

|                                           | FtsEX<br>(EMDB-<br>35362)<br>(PDB 8IDB) | FtsEX/RipC<br>(EMDB-<br>35363)<br>(PDB 8IDC) | FtsE <sup>E165Q</sup> X/<br>RipC/ATP<br>EMDB-36304)<br>(PDB 8JIA) | FtsEX/RipC/ATP<br>Type 1<br>EMDB-35364)<br>(PDB 8IDD) | FtsEX/RipC/ATP<br>Type 2<br>EMDB-35437)<br>(PDB 8IGQ) |
|-------------------------------------------|-----------------------------------------|----------------------------------------------|-------------------------------------------------------------------|-------------------------------------------------------|-------------------------------------------------------|
| <b>Data collection and processing</b>     |                                         |                                              |                                                                   |                                                       |                                                       |
| Magnification                             | 81,000                                  | 81,000                                       | 81,000                                                            | 81,000                                                | 81,000                                                |
| Voltage (kV)                              | 300                                     | 300                                          | 300                                                               | 300                                                   | 300                                                   |
| Electron exposure (e-/Å <sup>2</sup> )    | 45                                      | 45                                           | 38                                                                | 41                                                    | 41                                                    |
| Defocus range (μm)                        | -0.5 to -2                              | -0.5 to -2                                   | -0.5 to -2                                                        | -0.5 to -2                                            | -0.5 to -2                                            |
| Pixel size (Å)                            | 1.06                                    | 1.06                                         | 1.06                                                              | 1.06                                                  | 1.06                                                  |
| Symmetry imposed                          | C1                                      | C1                                           | C1                                                                | C1                                                    | C1                                                    |
| Initial particle images (no.)             | 468,703                                 | 209,919                                      | 800,159                                                           | 242,046                                               | 242,046                                               |
| Final particle images (no.)               | 111,140                                 | 83,984                                       | 256,362                                                           | 11,1341                                               | 62136                                                 |
| Map resolution (Å)                        | 3.9                                     | 3.9                                          | 3.9                                                               | 4.0                                                   | 5.7                                                   |
| FSC threshold                             | 0.143                                   | 0.143                                        | 0.143                                                             | 0.143                                                 | 0.143                                                 |
| Map resolution range (Å)                  | 3.0-6.5                                 | 2.8-6.5                                      | 3.0-6.5                                                           | 2.9-6.5                                               | 4.5-7                                                 |
| <b>Refinement</b>                         |                                         |                                              |                                                                   |                                                       |                                                       |
| Initial model used                        | AlphaFold*                              | 8IDB                                         | 8IDC                                                              | 8IDC                                                  | 8IDC                                                  |
| Model resolution (Å)                      |                                         |                                              |                                                                   |                                                       |                                                       |
| FSC threshold                             | 0.143                                   | 0.143                                        | 0.143                                                             | 0.143                                                 | 0.143                                                 |
| Model resolution range (Å)                | 3.8                                     | 3.9                                          | 3.4                                                               | 3.9                                                   | 5.7                                                   |
| Map sharpening B factor (Å <sup>2</sup> ) | -158                                    | -92                                          | -165                                                              | -91.8                                                 | -410                                                  |
| Model composition                         |                                         |                                              |                                                                   |                                                       |                                                       |
| Non-hydrogen atoms                        | 6835                                    | 9701                                         | 9587                                                              | 8768                                                  | 8599                                                  |
| Protein residues                          | 982                                     | 1342                                         | 1327                                                              | 1199                                                  | 1168                                                  |
| Ligands                                   | NA                                      | NA                                           | 2ATP                                                              | 2ATP                                                  | 2ADP                                                  |
| B factors (Å <sup>2</sup> )               |                                         |                                              |                                                                   |                                                       |                                                       |
| Protein                                   | 129.31                                  | 216.19                                       | 126.54                                                            | 153.53                                                | 220.8                                                 |
| Ligand                                    | NA                                      | NA                                           | 155.49                                                            | 160.18                                                | 34.74                                                 |
| R.m.s. deviations                         |                                         |                                              |                                                                   |                                                       |                                                       |
| Bond lengths (Å)                          | 0.005                                   | 0.004                                        | 0.006                                                             | 0.004                                                 | 0.004                                                 |
| Bond angles (°)                           | 1.077                                   | 1.034                                        | 1.108                                                             | 1.049                                                 | 1.093                                                 |
| Validation                                |                                         |                                              |                                                                   |                                                       |                                                       |
| MolProbity score                          | 1.68                                    | 1.79                                         | 1.8                                                               | 1.63                                                  | 1.82                                                  |
| Clashscore                                | 5                                       | 6                                            | 6                                                                 | 5                                                     | 7                                                     |
| Poor rotamers (%)                         | 0                                       | 0                                            | 0                                                                 | 0                                                     | 0                                                     |
| Ramachandran plot                         |                                         |                                              |                                                                   |                                                       |                                                       |
| Favored (%)                               | 93.70                                   | 92.86                                        | 92.78                                                             | 95.21                                                 | 93.78                                                 |
| Allowed (%)                               | 5.89                                    | 6.92                                         | 7                                                                 | 4.79                                                  | 6.04                                                  |
| Disallowed (%)                            | 0.41                                    | 0.23                                         | 0.23                                                              | 0                                                     | 0.17                                                  |

AlphaFold\*: The initial models used were obtained from the AlphaFold under code:

AF-A0A045JB98-F1 [<https://alphafold.ebi.ac.uk/entry/A0A045JB98>] (*MtbFtsE*);

AF-A0A045GRS5-F1 [<https://alphafold.ebi.ac.uk/entry/A0A045GRS5>] (*MtbFtsX*);

AF-P9WHU3-F1 [<https://alphafold.ebi.ac.uk/entry/P9WHU3>] (*MtbRipC*).
